# Supplementary material for: Survival Factors Associated with Toilet-Related Out-of-Hospital Cardiac Arrest
Source: MDPI journal article supplement (doi:10.3390/ecm1020009), 2024-03-30
Supplement: s1 [file s1]

Archive with 1 entries (1 files):
- ecm-2895235-supplementary.pdf
