# Supplementary material for: Survival Factors Associated with Toilet-Related Out-of-Hospital Cardiac Arrest
Source: MDPI journal article supplement (doi:10.3390/ecm1020009), 2024-03-30
Supplement: s1 [file s1 › ecm-2895235-supplementary.pdf]

**Supplemental Table S1. Characteristics of the non-EMS-witnessed patients with OHCA in home and in public in toilets**

| Characteristics                         | EMS-transported OHCA<br>(non-EMS-witnessed) |                                         |                                   | Location                        |                                         |                                   |                                |                                      |                                   |
|-----------------------------------------|---------------------------------------------|-----------------------------------------|-----------------------------------|---------------------------------|-----------------------------------------|-----------------------------------|--------------------------------|--------------------------------------|-----------------------------------|
|                                         |                                             |                                         |                                   | Home                            |                                         |                                   | Public locations               |                                      |                                   |
|                                         | Total<br>N = 330,849                        | in toilets<br>% (N)<br>4.2%<br>(13,881) | Crude OR<br>(95% CI)              | Total<br>N = 244,607<br>(73.9%) | in toilets<br>% (N)<br>5.4%<br>(13,310) | Crude OR<br>(95% CI)              | Total<br>N = 86,242<br>(26.1%) | in toilets<br>% (N)<br>0.7%<br>(571) | Crude OR<br>(95% CI)              |
| <b>Bystander CPR</b>                    |                                             |                                         |                                   |                                 |                                         |                                   |                                |                                      |                                   |
| Provided                                | 183,973                                     | 2.8%<br>(5,077)                         | <b>0.44</b><br><b>(0.43–0.46)</b> | 118,242                         | 4.0%<br>(4,719)                         | <b>0.57</b><br><b>(0.55–0.59)</b> | 65,731                         | 0.5%<br>(358)                        | <b>0.52</b><br><b>(0.44–0.62)</b> |
| Not provided                            | 146,876                                     | 6.0%<br>(8,804)                         | (Reference)                       | 126,365                         | 6.8%<br>(8,591)                         | (Reference)                       | 20,511                         | 1.0%<br>(213)                        | (Reference)                       |
| <b>Public-access<br/>defibrillation</b> |                                             |                                         |                                   |                                 |                                         |                                   |                                |                                      |                                   |
| Provided                                | 5,447                                       | 0.5%<br>(29)                            | <b>0.12</b><br><b>(0.08–0.17)</b> | 208                             | 1.9%<br>(4)                             | <b>0.34</b><br><b>(0.13–0.91)</b> | 5,239                          | 0.5%<br>(25)                         | 0.70<br>(0.47–1.05)               |
| Not provided                            | 325,402                                     | 4.3%<br>(13,852)                        | (Reference)                       | 244,399                         | 4.1%<br>(13,306)                        | (Reference)                       | 81,003                         | 0.7%<br>(546)                        | (Reference)                       |
| <b>Bystander<br/>classification</b>     |                                             |                                         |                                   |                                 |                                         |                                   |                                |                                      |                                   |
| Family                                  | 77,538                                      | 5.6%<br>(4,375)                         | <b>1.32</b><br><b>(1.27–1.37)</b> | 74,796                          | 5.8%<br>(4,359)                         | <b>1.09</b><br><b>(1.05–1.13)</b> | 2,742                          | 0.6%<br>(16)                         | 0.68<br>(0.41–1.13)               |
| Friend/Colleague                        | 7,781                                       | 1.1%<br>(87)                            | <b>0.25</b><br><b>(0.20–0.31)</b> | 2,008                           | 3.0%<br>(61)                            | <b>0.55</b><br><b>(0.43–0.71)</b> | 5,773                          | 0.5%<br>(26)                         | <b>0.53</b><br><b>(0.35–0.78)</b> |
| Others                                  | 32,468                                      | 0.6%<br>(193)                           | <b>0.13</b><br><b>(0.11–0.15)</b> | 4,252                           | 2.0%<br>(86)                            | <b>0.36</b><br><b>(0.29–0.45)</b> | 28,216                         | 0.4%<br>(107)                        | <b>0.44</b><br><b>(0.36–0.55)</b> |
| Unwitnessed<br>(No bystander)           | 213,062                                     | 4.3%<br>(9,226)                         | (Reference)                       | 163,551                         | 5.4%<br>(8,804)                         | (Reference)                       | 49,511                         | 0.9%<br>(422)                        | (Reference)                       |

Abbreviations: EMS, emergency medical service; OHCA, out-of-hospital cardiac arrest; CPR, cardiopulmonary resuscitation

The crude odds ratios (cORs) and 95% confidence intervals (CIs) are calculated using univariate analysis for significant variables.
